# Supplementary material for: Identification of proteins associated with development of psoriatic arthritis in peripheral blood mononuclear cells: a quantitative iTRAQ-based proteomics study
Source: PubMed Central journal article supplement (PMC8336315; doi:10.1186/s12967-021-03006-x), 2021-08-03
Supplement: 12967_2021_3006_MOESM3_ESM.pdf [file 12967_2021_3006_MOESM3_ESM.pdf]

(A)

43kDa  
34kDa

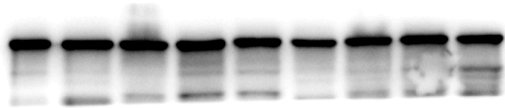

(B)

43kDa

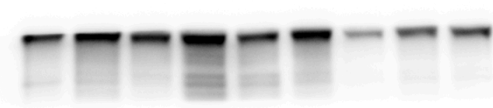

(C)

43kDa

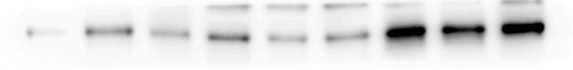

**Figure.** Raw Western blotting images for Fig.5. (A) Raw western blotting image for GAPDH (used as a loading control, 37kDa); (B) Raw western blotting image for p-p38 (43kDa); (C) Raw western blotting image for SIRT2 (43kDa).
